# Supplementary material for: Cohesion is established during DNA replication utilising chromosome associated cohesin rings as well as those loaded de novo onto nascent DNAs
Source: eLife. 2020 Jun 9;9:e56611. doi: 10.7554/eLife.56611 (PMC7282809; doi:10.7554/eLife.56611)
Supplement: Source data 1. [file elife-56611-data1.xlsx]

## Sheet: Example
EXAMPLE OF RELATIVE FITNESS CALCULATION BASED ON THE COMPETITION ASSAY DATA
The ratio (r) of the two competing populations of cells is quantified over three days
cell counts	tot cells	cerulean	cherry	ratios
ctf4D vs wt day1 cl1	19820	257	19563	76.1206
ctf4D vs wt day2 cl1	26940	6091	20849	3.42292
ctf4D vs wt day3 cl1	59205	47681	11524	0.24169
Natural logarithms of the ratios are calculated
ln(ratios)	day1	day2	day3
ctf4D vs wt cl1	4.33232	1.23049	-1.4201
The number of generations (g) between samples are calculated based of the number of events acquired by FACS in consecutive days
	counts measured				pre-dilution				concentration				generations				incr. generations
generations	day1	day2	day3		day1	day2	day3		day1	day2	day3		day1	day2	day3		day1	day2	day3
ctf4D vs wt cl1	19820	26940	59205		1982000	2694000	5920500		1982	2694	5920.5		0	10.4086	11.1018		0	10.4086	21.5103
The relative fitness is calculated as the slope of the linear regression between the points having coordinates x=g and y=ln(r)
	ln(ratios)				incr. generations
Fitness	day1	day2	day3		day1	day2	day3		fitness
ctf4D vs wt cl1	4.33232	1.23049	-1.4201		0	10.4086	21.5103		-0.267108

## Sheet: wt
cell counts	tot cells	cerulean	cherry	ratios
WT vs WT day1 cl1	11196	5743	5453	0.949504
WT vs WT day1 cl2	25546	12690	12856	1.01308
WT vs WT day1 cl3	13590	6529	7061	1.08148
WT vs WT day2 cl1	15070	8006	7064	0.882338
WT vs WT day2 cl2	19000	9719	9281	0.954934
WT vs WT day2 cl3	13303	6225	7078	1.13703
WT vs WT day3 cl1	12790	5924	6866	1.15901
WT vs WT day3 cl2	9749	4534	5215	1.1502
WT vs WT day3 cl3	22179	11362	10817	0.952033
ln(ratios)	day1	day2	day3
WT vs WT cl1	-0.0518158	-0.12518	0.14757
WT vs WT cl2	0.0129963	-0.0461134	0.139935
WT vs WT cl3	0.0783329	0.128418	-0.0491555
	counts measured				pre-dilution				concentration				generations				incr. generations
generations	day1	day2	day3		day1	day2	day3		day1	day2	day3		day1	day2	day3		day1	day2	day3
WT vs WT cl1	11196	15070	12790		1119600	1507000	1279000		1119.6	1507	1279		0	10.3945	9.72912		0	10.4086	20.1236
WT vs WT cl2	25546	19000	9749		2554600	1900000	974900		2554.6	1900	974.9		0	9.53869	9.00311		0	10.4086	18.5418
WT vs WT cl3	13590	13303	22179		1359000	1330300	2217900		1359	1330.3	2217.9		0	9.93499	10.7032		0	10.4086	20.6382
	ln(ratios)				incr. generations
Fitness	day1	day2	day3		day1	day2	day3		fitness
WT vs WT cl1	-0.0518158	-0.12518	0.14757		0	10.4086	20.1236		0.00970661
WT vs WT cl2	0.0129963	-0.0461134	0.139935		0	10.4086	18.5418		0.00627372
WT vs WT cl3	0.0783329	0.128418	-0.0491555		0	10.4086	20.6382		-0.00614526

## Sheet: ctf18
cell counts	tot cells	cerulean	cherry	ratios
ctf18D vs wt day1 cl1	41400	11991	29409	2.45259
ctf18D vs wt day1 cl2	33465	11128	22337	2.00728
ctf18D vs wt day1 cl3	34040	11010	23030	2.09173
ctf18D vs wt day1 cl4	15617	3969	11648	2.93474
ctf18D vs wt day1 cl5	15847	3921	11926	3.04157
ctf18D vs wt day1 cl6	15824	4079	11745	2.87938
ctf18D vs wt day2 cl1	22948	12708	10240	0.805792
ctf18D vs wt day2 cl2	45195	22588	22607	1.00084
ctf18D vs wt day2 cl3	43263	21277	21986	1.03332
ctf18D vs wt day2 cl4	3275	1536	1739	1.13216
ctf18D vs wt day2 cl5	8361	3818	4543	1.18989
ctf18D vs wt day2 cl6	9389	4407	4982	1.13047
ctf18D vs wt day3 cl1	31510	21875	9635	0.440457
ctf18D vs wt day3 cl2	28704	19878	8826	0.444008
ctf18D vs wt day3 cl3	34247	21206	13041	0.614967
ctf18D vs wt day3 cl4	7307	4652	2655	0.570722
ctf18D vs wt day3 cl5	7880	4965	2915	0.58711
ctf18D vs wt day3 cl6	8903	5985	2918	0.487552
ln(ratios)	day1	day2	day3
ctf18D vs wt cl1	0.897144	-0.21593	-0.819942
ctf18D vs wt cl2	0.69678	0.000840801	-0.811912
ctf18D vs wt cl3	0.737994	0.0327792	-0.486186
ctf18D vs wt cl4	1.07662	0.124129	-0.560853
ctf18D vs wt cl5	1.11237	0.173861	-0.532543
ctf18D vs wt cl6	1.05758	0.122637	-0.718358
	counts measured				pre-dilution				concentration				generations				incr. generations
generations	day1	day2	day3		day1	day2	day3		day1	day2	day3		day1	day2	day3		day1	day2	day3
ctf18D vs wt cl1	41400	22948	31510		4140000	2294800	3151000		4140	2294.8	3151		0	9.11452	10.4232		0	10.4086	19.5377
ctf18D vs wt cl2	33465	45195	28704		3346500	4519500	2870400		3346.5	4519.5	2870.4		0	10.3993	9.31087		0	10.4086	19.7102
ctf18D vs wt cl3	34040	43263	34247		3404000	4326300	3424700		3404	4326.3	3424.7		0	10.3117	9.62863		0	10.4086	19.9403
ctf18D vs wt cl4	15617	3275	7307		1561700	327500	730700		1561.7	327.5	730.7		0	7.71223	11.1236		0	10.4086	18.8358
ctf18D vs wt cl5	15847	8361	7880		1584700	836100	788000		1584.7	836.1	788		0	9.04332	9.8803		0	10.4086	18.9236
ctf18D vs wt cl6	15824	9389	8903		1582400	938900	890300		1582.4	938.9	890.3		0	9.21271	9.8891		0	10.4086	19.1018
	ln(ratios)				incr. generations
fitness	day1	day2	day3		day1	day2	day3		fitness
ctf18D vs wt cl1	0.897144	-0.21593	-0.819942		0	10.4086	19.5377		-0.0883281
ctf18D vs wt cl2	0.69678	0.000840801	-0.811912		0	10.4086	19.7102		-0.0763526
ctf18D vs wt cl3	0.737994	0.0327792	-0.486186		0	10.4086	19.9403		-0.0614895
ctf18D vs wt cl4	1.07662	0.124129	-0.560853		0	10.4086	18.8358		-0.0871108
ctf18D vs wt cl5	1.11237	0.173861	-0.532543		0	10.4086	18.9236		-0.0870426
ctf18D vs wt cl6	1.05758	0.122637	-0.718358		0	10.4086	19.1018		-0.0928696

## Sheet: ctf4
cell counts	tot cells	cerulean	cherry	ratios
ctf4D vs wt day1 cl1	19820	257	19563	76.1206
ctf4D vs wt day1 cl2	16491	959	15532	16.196
ctf4D vs wt day1 cl3	22744	168	22576	134.381
ctf4D vs wt day2 cl1	26940	6091	20849	3.42292
ctf4D vs wt day2 cl2	12374	5578	6796	1.21836
ctf4D vs wt day2 cl3	44657	3355	41302	12.3106
ctf4D vs wt day3 cl1	59205	47681	11524	0.24169
ctf4D vs wt day3 cl2	15226	11912	3314	0.278207
ctf4D vs wt day3 cl3	61114	35123	25991	0.739999
ln(ratios)	day1	day2	day3
ctf4D vs wt cl1	4.33232	1.23049	-1.4201
ctf4D vs wt cl2	2.78477	0.197504	-1.27939
ctf4D vs wt cl3	4.90068	2.51046	-0.301106
	counts measured				pre-dilution				concentration				generations				incr. generations
generations	day1	day2	day3		day1	day2	day3		day1	day2	day3		day1	day2	day3		day1	day2	day3
ctf4D vs wt cl1	19820	26940	59205		1982000	2694000	5920500		1982	2694	5920.5		0	10.4086	11.1018		0	10.4086	21.5103
ctf4D vs wt cl2	16491	12374	15226		1649100	1237400	1522600		1649.1	1237.4	1522.6		0	9.55142	10.265		0	10.4086	19.8164
ctf4D vs wt cl3	22744	44657	61114		2274400	4465700	6111400		2274.4	4465.7	6111.4		0	10.9392	10.4184		0	10.4086	21.3576
	ln(ratios)				incr. generations
Fitness	day1	day2	day3		day1	day2	day3		fitness
ctf4D vs wt cl1	4.33232	1.23049	-1.4201		0	10.4086	21.5103		-0.267108
ctf4D vs wt cl2	2.78477	0.197504	-1.27939		0	10.4086	19.8164		-0.205859
ctf4D vs wt cl3	4.90068	2.51046	-0.301106		0	10.4086	21.3576		-0.243671

## Sheet: ctf18 2xSCC2
cell counts	tot cells	cerulean	cherry	ratios
REF vs ctf18D day1 cl1	21606	8030	13576	1.69066
REF vs ctf18D day1 cl2	24301	9355	14946	1.59765
REF vs ctf18D day1 cl3	22325	8290	14035	1.693
ctf18D 2xSCC2 vs REF day1 cl1	29762	9241	20521	2.22065
ctf18D 2xSCC2 vs REF day1 cl2	41906	12225	29681	2.42789
ctf18D 2xSCC2 vs REF day1 cl3	47978	13777	34201	2.48247
ctf18D 2xSCC2 vs REF day1 cl4	10316	3317	6999	2.11004
ctf18D 2xSCC2 vs REF day1 cl5	10919	3383	7536	2.22761
ctf18D 2xSCC2 vs REF day1 cl6	10713	3635	7078	1.94718
ctf18D 2xSCC2 vs REF day1 cl7	12006	3924	8082	2.05963
ctf18D 2xSCC2 vs REF day1 cl8	13317	4374	8943	2.04458
ctf18D 2xSCC2 vs REF day1 cl9	10877	3517	7360	2.09269
REF vs ctf18D day2 cl1	32430	8038	24392	3.03459
REF vs ctf18D day2 cl2	19280	5016	14264	2.8437
REF vs ctf18D day2 cl3	26496	6456	20040	3.10409
ctf18D 2xSCC2 vs REF day2 cl1	31947	7103	24844	3.49768
ctf18D 2xSCC2 vs REF day2 cl2	24559	5505	19054	3.46122
ctf18D 2xSCC2 vs REF day2 cl3	28474	6283	22191	3.53191
ctf18D 2xSCC2 vs REF day2 cl4	9008	2153	6855	3.18393
ctf18D 2xSCC2 vs REF day2 cl5	9159	2106	7053	3.349
ctf18D 2xSCC2 vs REF day2 cl6	7739	1908	5831	3.05608
ctf18D 2xSCC2 vs REF day2 cl7	7824	1930	5894	3.05389
ctf18D 2xSCC2 vs REF day2 cl8	8148	2113	6035	2.85613
ctf18D 2xSCC2 vs REF day2 cl9	8519	2187	6332	2.89529
REF vs ctf18D day3 cl1	20449	3736	16713	4.4735
REF vs ctf18D day3 cl2	16533	2806	13727	4.89202
REF vs ctf18D day3 cl3	17040	2794	14246	5.09878
ctf18D 2xSCC2 vs REF day3 cl1	17212	2814	14398	5.11656
ctf18D 2xSCC2 vs REF day3 cl2	22345	3653	18692	5.11689
ctf18D 2xSCC2 vs REF day3 cl3	17291	2931	14360	4.89935
ctf18D 2xSCC2 vs REF day3 cl4	9543	1591	7952	4.99811
ctf18D 2xSCC2 vs REF day3 cl5	9663	1585	8078	5.09653
ctf18D 2xSCC2 vs REF day3 cl6	8482	1428	7054	4.93978
ctf18D 2xSCC2 vs REF day3 cl7	7523	1325	6198	4.67774
ctf18D 2xSCC2 vs REF day3 cl8	7803	1618	6185	3.82262
ctf18D 2xSCC2 vs REF day3 cl9	8957	1645	7312	4.44498
ln(ratios)	day1	day2	day3
REF vs ctf18D cl1	0.525119	1.11007	1.49817
REF vs ctf18D cl2	0.468533	1.04511	1.5876
REF vs ctf18D cl3	0.526504	1.13272	1.629
ctf18D 2xSCC2 vs REF cl1	0.797799	1.2521	1.63248
ctf18D 2xSCC2 vs REF cl2	0.887024	1.24162	1.63255
ctf18D 2xSCC2 vs REF cl3	0.909254	1.26184	1.5891
ctf18D 2xSCC2 vs REF cl4	0.746707	1.15812	1.60906
ctf18D 2xSCC2 vs REF cl5	0.800929	1.20866	1.62856
ctf18D 2xSCC2 vs REF cl6	0.666382	1.11713	1.59732
ctf18D 2xSCC2 vs REF cl7	0.722528	1.11641	1.54281
ctf18D 2xSCC2 vs REF cl8	0.715193	1.04947	1.34094
ctf18D 2xSCC2 vs REF cl9	0.738452	1.06309	1.49178
	counts measured				pre-dilution				concentration				generations				incr. generations
generations	day1	day2	day3		day1	day2	day3		day1	day2	day3		day1	day2	day3		day1	day2	day3
REF vs ctf18D cl1	21606	32430	20449		2160600	3243000	2044900		2160.6	3243	2044.9		0	10.5517	9.30049		0	10.4086	19.8522
REF vs ctf18D cl2	24301	19280	16533		2430100	1928000	1653300		2430.1	1928	1653.3		0	9.63187	9.74403		0	10.4086	19.3759
REF vs ctf18D cl3	22325	26496	17040		2232500	2649600	1704000		2232.5	2649.6	1704		0	10.2129	9.32894		0	10.4086	19.5418
ctf18D 2xSCC2 vs REF cl1	29762	31947	17212		2976200	3194700	1721200		2976.2	3194.7	1721.2		0	10.068	9.07352		0	10.4086	19.1415
ctf18D 2xSCC2 vs REF cl2	41906	24559	22345		4190600	2455900	2234500		4190.6	2455.9	2234.5		0	9.19488	9.82948		0	10.4086	19.0244
ctf18D 2xSCC2 vs REF cl3	47978	28474	17291		4797800	2847400	1729100		4797.8	2847.4	1729.1		0	9.21306	9.24616		0	10.4086	18.4592
ctf18D 2xSCC2 vs REF cl4	10316	9008	9543		1031600	900800	954300		1031.6	900.8	954.3		0	9.77018	10.049		0	10.4086	19.8192
ctf18D 2xSCC2 vs REF cl5	10919	9159	9663		1091900	915900	966300		1091.9	915.9	966.3		0	9.71221	10.0431		0	10.4086	19.7553
ctf18D 2xSCC2 vs REF cl6	10713	7739	8482		1071300	773900	848200		1071.3	773.9	848.2		0	9.49664	10.098		0	10.4086	19.5947
ctf18D 2xSCC2 vs REF cl7	12006	7824	7523		1200600	782400	752300		1200.6	782.4	752.3		0	9.34801	9.90919		0	10.4086	19.2572
ctf18D 2xSCC2 vs REF cl8	13317	8148	7803		1331700	814800	780300		1331.7	814.8	780.3		0	9.25703	9.90337		0	10.4086	19.1604
ctf18D 2xSCC2 vs REF cl9	10877	8519	8957		1087700	851900	895700		1087.7	851.9	895.7		0	9.61326	10.0381		0	10.4086	19.6514
	ln(ratios)				incr. generations
Fitness	day1	day2	day3		day1	day2	day3		fitness	norm. fitness
REF vs ctf18D cl1	0.525119	1.11007	1.49817		0	10.4086	19.8522		0.0491369
REF vs ctf18D cl2	0.468533	1.04511	1.5876		0	10.4086	19.3759		0.0576931
REF vs ctf18D cl3	0.526504	1.13272	1.629		0	10.4086	19.5418		0.0564595
ctf18D 2xSCC2 vs REF cl1	0.797799	1.2521	1.63248		0	10.4086	19.1415		0.0436072	-0.00552965
ctf18D 2xSCC2 vs REF cl2	0.887024	1.24162	1.63255		0	10.4086	19.0244		0.0390123	-0.0186807
ctf18D 2xSCC2 vs REF cl3	0.909254	1.26184	1.5891		0	10.4086	18.4592		0.0366886	-0.0197709
ctf18D 2xSCC2 vs REF cl4	0.746707	1.15812	1.60906		0	10.4086	19.8192		0.0434409	-0.00569603
ctf18D 2xSCC2 vs REF cl5	0.800929	1.20866	1.62856		0	10.4086	19.7553		0.0418429	-0.0158502
ctf18D 2xSCC2 vs REF cl6	0.666382	1.11713	1.59732		0	10.4086	19.5947		0.047417	-0.00904258
ctf18D 2xSCC2 vs REF cl7	0.722528	1.11641	1.54281		0	10.4086	19.2572		0.0424579	-0.00667899
ctf18D 2xSCC2 vs REF cl8	0.715193	1.04947	1.34094		0	10.4086	19.1604		0.0326412	-0.0250519
ctf18D 2xSCC2 vs REF cl9	0.738452	1.06309	1.49178		0	10.4086	19.6514		0.038185	-0.0182746

## Sheet: ctf4 2xSCC2
cell counts	tot cells	cerulean	cherry	ratios
REF vs ctf4D day1 cl1	23045	11462	11583	1.01056
REF vs ctf4D day1 cl2	22546	11186	11360	1.01556
REF vs ctf4D day1 cl3	21948	10620	11328	1.06667
ctf4D 2xSCC2 vs REF day1 cl1	26680	9343	17337	1.85561
ctf4D 2xSCC2 vs REF day1 cl2	24794	9066	15728	1.73483
ctf4D 2xSCC2 vs REF day1 cl3	21950	8088	13862	1.7139
REF vs ctf4D day2 cl1	10143	5075	5068	0.998621
REF vs ctf4D day2 cl2	12444	6012	6432	1.06986
REF vs ctf4D day2 cl3	12142	5914	6228	1.05309
ctf4D 2xSCC2 vs REF day2 cl1	9131	2126	7005	3.29492
ctf4D 2xSCC2 vs REF day2 cl2	13579	3483	10096	2.89865
ctf4D 2xSCC2 vs REF day2 cl3	11027	2881	8146	2.82749
REF vs ctf4D day3 cl1	6913	3116	3797	1.21855
REF vs ctf4D da3 cl2	8274	4000	4274	1.0685
REF vs ctf4D day3 cl3	8786	4016	4770	1.18775
ctf4D 2xSCC2 vs REF day3 cl1	7479	1056	6423	6.08239
ctf4D 2xSCC2 vs REF day3 cl2	8045	1259	6786	5.38999
ctf4D 2xSCC2 vs REF day3 cl3	8119	1273	6846	5.37785
ln(ratios)	day1	day2	day3
REF vs ctf4D cl1	0.0105013	-0.00138026	0.197661
REF vs ctf4D cl2	0.0154354	0.0675281	0.0662558
REF vs ctf4D cl3	0.0645385	0.0517328	0.17206
ctf4D 2xSCC2 vs REF cl1	0.618216	1.19238	1.8054
ctf4D 2xSCC2 vs REF cl2	0.550911	1.06425	1.68454
ctf4D 2xSCC2 vs REF cl3	0.53877	1.03939	1.68229
	counts measured				pre-dilution				concentration				generations				incr. generations
generations	day1	day2	day3		day1	day2	day3		day1	day2	day3		day1	day2	day3		day1	day2	day3
REF vs ctf4D cl1	23045	10143	6913		2304500	1014300	691300		2304.5	1014.3	691.3		0	8.78181	9.41268		0	10.4086	18.1945
REF vs ctf4D cl2	22546	12444	8274		2254600	1244400	827400		2254.6	1244.4	827.4		0	9.10836	9.37699		0	10.4086	18.4854
REF vs ctf4D cl3	21948	12142	8786		2194800	1214200	878600		2194.8	1214.2	878.6		0	9.1117	9.49906		0	10.4086	18.6108
ctf4D 2xSCC2 vs REF cl1	26680	9131	7479		2668000	913100	747900		2668	913.1	747.9		0	8.41887	9.67786		0	10.4086	18.0967
ctf4D 2xSCC2 vs REF cl2	24794	13579	8045		2479400	1357900	804500		2479.4	1357.9	804.5		0	9.09717	9.21057		0	10.4086	18.3077
ctf4D 2xSCC2 vs REF cl3	21950	11027	8119		2195000	1102700	811900		2195	1102.7	811.9		0	8.9726	9.52412		0	10.4086	18.4967
	ln(ratios)				incr. generations
Fitness	day1	day2	day3		day1	day2	day3		fitness	norm.fitness
REF vs ctf4D cl1	0.0105013	-0.00138026	0.197661		0	10.4086	18.1945		0.00966268
REF vs ctf4D cl2	0.0154354	0.0675281	0.0662558		0	10.4086	18.4854		0.00285547
REF vs ctf4D cl3	0.0645385	0.0517328	0.17206		0	10.4086	18.6108		0.00546906
ctf4D 2xSCC2 vs REF cl1	0.618216	1.19238	1.8054		0	10.4086	18.0967		0.0650048	0.0553421
ctf4D 2xSCC2 vs REF cl2	0.550911	1.06425	1.68454		0	10.4086	18.3077		0.0612703	0.0584148
ctf4D 2xSCC2 vs REF cl3	0.53877	1.03939	1.68229		0	10.4086	18.4967		0.0611802	0.0557111

## Sheet: Fitness summary
clone	Fitness1	Fitness2	Fitness3	Fitness4	Fitness5	Fitness6	Fitness7	Fitness8	Fitness9
WT	0.00970661	0.00627372	-0.00614526
ctf18D	-0.0883281	-0.0763526	-0.0614895	-0.0871108	-0.0870426	-0.0928696
ctf4D	-0.267108	-0.205859	-0.243671
ctf18D 2xSCC2	-0.00552965	-0.0186807	-0.0197709	-0.00569603	-0.0158502	-0.00904258	-0.00667899	-0.0250519	-0.0182746
ctf4D 2xSCC2	0.0553421	0.0584148	0.0557111
